# Supplementary material
Source: Elsevier journal article supplement (https://www.uniad.org.br/wp-content/uploads/2014/02/mmc1.pdf)
Supplement: mmc1 [file mmc1.pdf]

## Supplementary Material for the article

### The global epidemiology and burden of psychostimulant dependence: findings from the Global burden of Disease Study 2010

Louisa Degenhardt<sup>1,2</sup>, Amanda J. Baxter<sup>3,4</sup>, Yong Yi Lee<sup>3,4</sup>, Wayne Hall<sup>5,6</sup>, Grant Sara<sup>4,7,8</sup>, Nicole Johns<sup>9</sup>,  
Abraham Flaxman<sup>9</sup>, Harvey Whiteford<sup>3,4</sup>, and Theo Vos<sup>9</sup>

#### Author affiliations:

1. National Drug and Alcohol Research Centre, University of New South Wales, AUSTRALIA
2. Melbourne School of Population and Global Health, University of Melbourne, AUSTRALIA
3. Policy and Epidemiology Group, Queensland Centre for Mental Health Research, Brisbane AUSTRALIA
4. School of Population Health, University of Queensland, Herston AUSTRALIA
5. University of Queensland Centre for Clinical Research, University of Queensland, Brisbane AUSTRALIA
6. National Addiction Centre, Kings College, London ENGLAND
7. InforMH, Mental Health and Drug and Alcohol Office, NSW Health, Sydney, Australia; Discipline of Psychiatry, Sydney Medical School, University of Sydney, Sydney, Australia
8. Institute for Health Metrics and Evaluation, University of Washington, Seattle, Washington, USA

This material supplements but does not replace the content of the peer-reviewed paper published in Drug and Alcohol Dependence

### Supplementary Material 1

World map showing data sources for the amphetamine dependence model

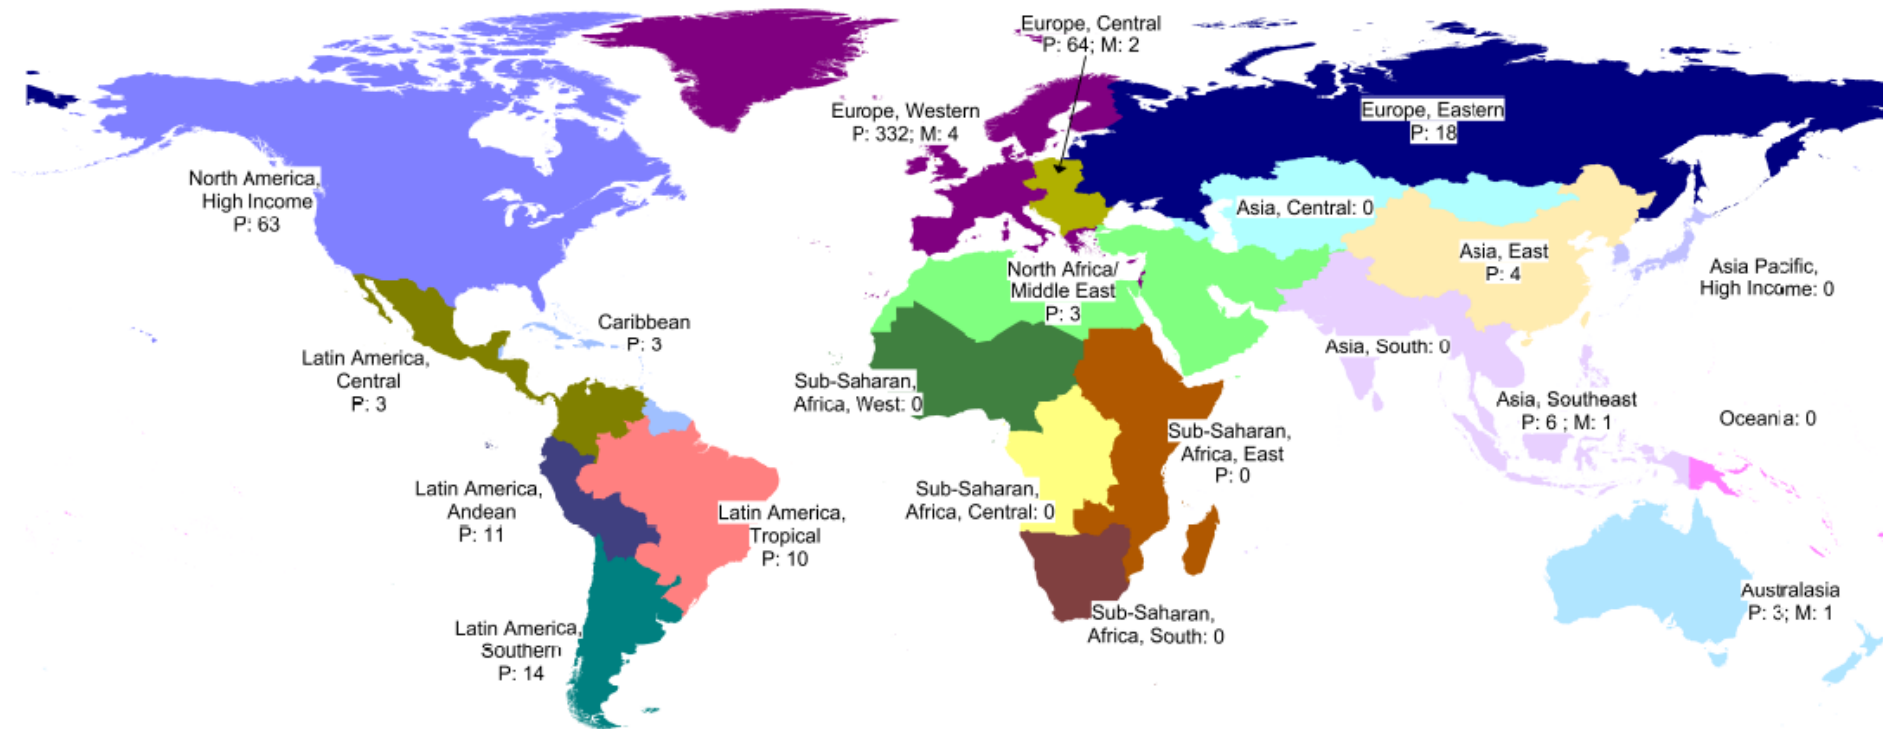

Notes:

- Prevalence: P
- Incidence: I
- Remission: R
- Mortality: M

### World map showing data sources for the cocaine dependence model

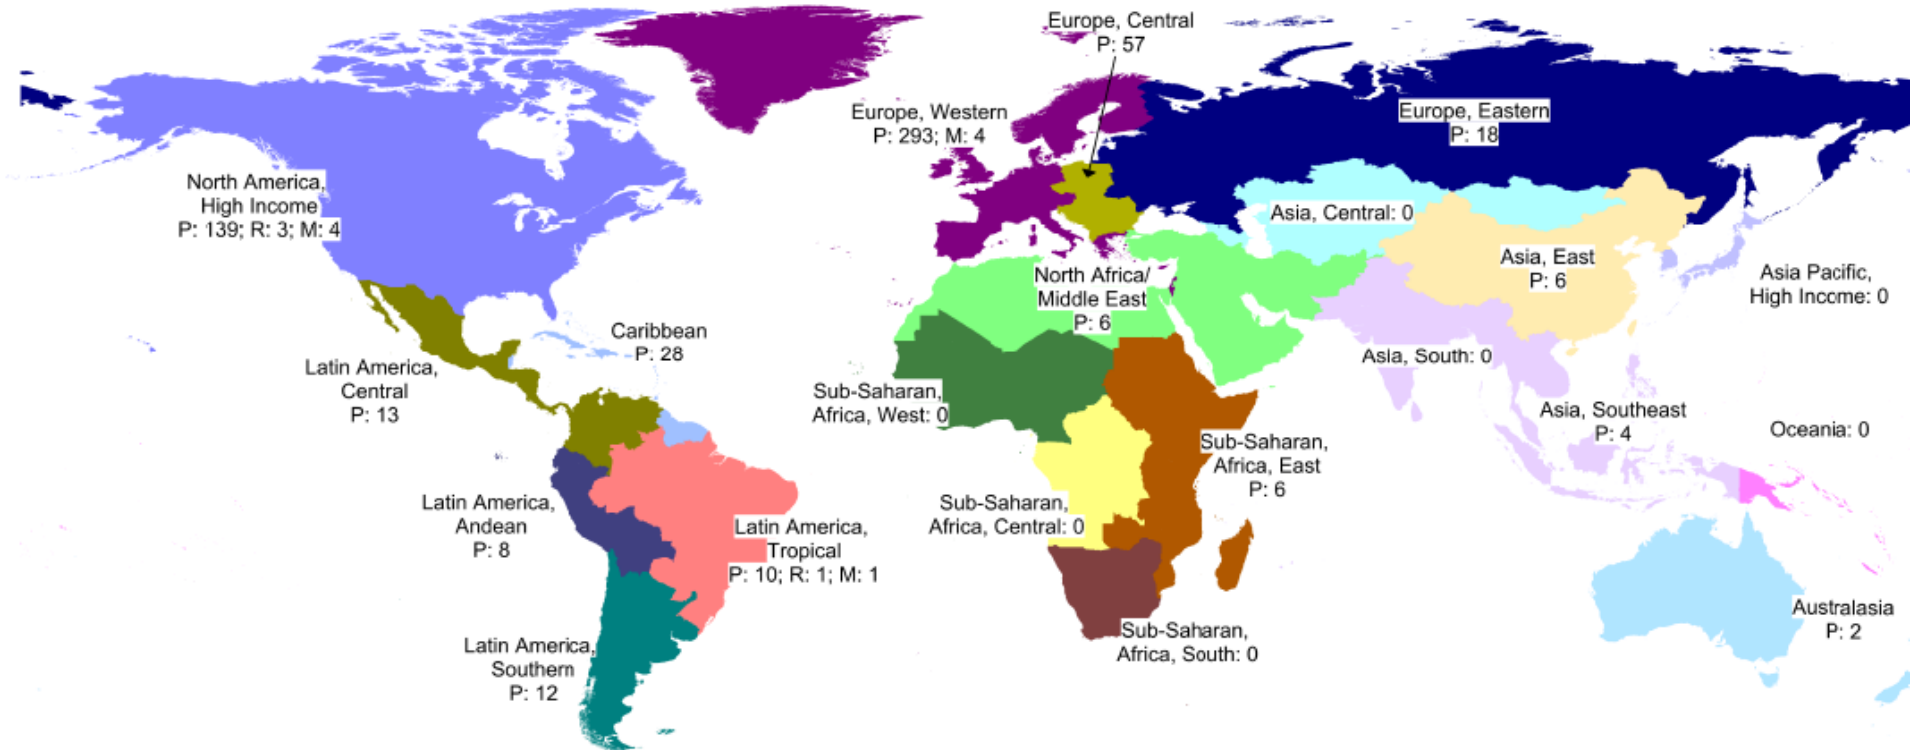

Notes:

Prevalence: P  
Incidence: I  
Remission: R  
Mortality: M
